# Supplementary material
Source: bioRxiv or medRxiv preprint supplement (https://www.biorxiv.org/highwire/filestream/63767/field_highwire_adjunct_files/0/209072-1.pdf)

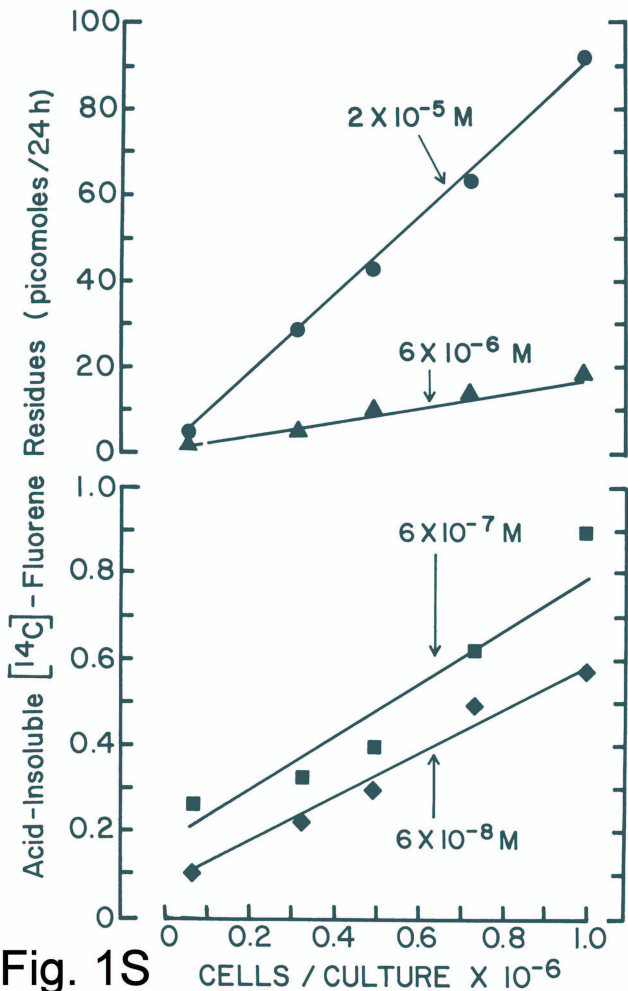

Fig. 1S

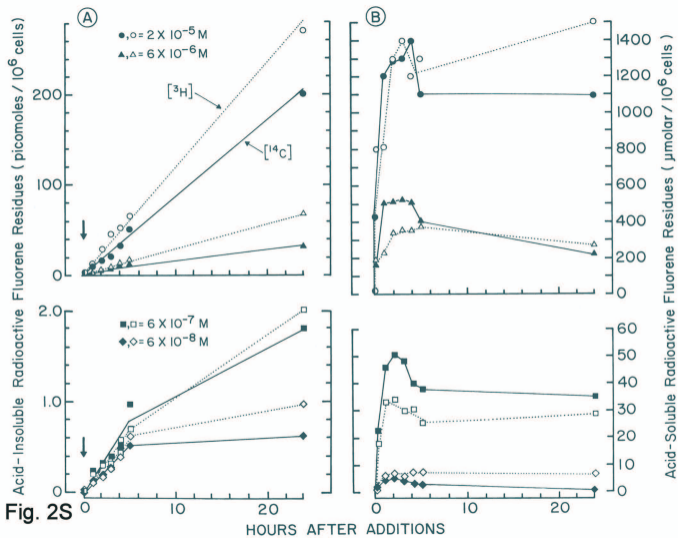

Supplement: Supplementary file [file 209072-1.pdf]
